# Supplementary material for: Prediction of Lime Tolerance in Rhododendron Based on Herbarium Specimen and Geochemical Data
Source: Front Plant Sci. 2018 Oct 23;9:1538. doi: 10.3389/fpls.2018.01538 (PMC6206291; doi:10.3389/fpls.2018.01538)
Supplement: TABLE S1 — The number of specimens for each taxon in 525 Rhododendron taxa. [file Table_1.XLSX]

## Sheet: Number of specimens
No.	Species name	Number of specimens
1	Rhododendron simsii	1435
2	Rhododendron decorum	1374
3	Rhododendron micranthum	826
4	Rhododendron mariesii	799
5	Rhododendron racemosum	630
6	Rhododendron oreodoxa	582
7	Rhododendron stamineum	573
8	Rhododendron ovatum	556
9	Rhododendron rubiginosum	488
10	Rhododendron pachytrichum	457
11	Rhododendron yunnanense	447
12	Rhododendron mariae	431
13	Rhododendron concinnum	391
14	Rhododendron microphyton	378
15	Rhododendron augustinii	376
16	Rhododendron vernicosum	374
17	Rhododendron siderophyllum	357
18	Rhododendron irroratum	342
19	Rhododendron mucronulatum	322
20	Rhododendron lutescens	320
21	Rhododendron fortunei	319
22	Rhododendron davidsonianum	316
23	Rhododendron latoucheae	305
24	Rhododendron spinuliferum	300
25	Rhododendron moulmainense	292
26	Rhododendron argyrophyllum	282
27	Rhododendron bachii	275
28	Rhododendron calophytum	275
29	Rhododendron delavayi	258
30	Rhododendron polylepis	254
31	Rhododendron oreodoxa var. fargesii	242
32	Rhododendron championiae	242
33	Rhododendron dauricum	242
34	Rhododendron simiarum	242
35	Rhododendron farrerae	229
36	Rhododendron rivulare	217
37	Rhododendron ambiguum	213
38	Rhododendron sperabile var. weihsiense	181
39	Rhododendron molle	179
40	Rhododendron faberi	178
41	Rhododendron heliolepis	178
42	Rhododendron pachypodum	173
43	Rhododendron maddenii subsp. crassum	170
44	Rhododendron trichocladum	169
45	Rhododendron sutchuenense	168
46	Rhododendron aganniphum	165
47	Rhododendron spiciferum	164
48	Rhododendron pingianum	162
49	Rhododendron ririei	161
50	Rhododendron wardii	160
51	Rhododendron beesianum	159
52	Rhododendron leptothrium	159
53	Rhododendron strigillosum	157
54	Rhododendron hypoglaucum	155
55	Rhododendron wiltonii	155
56	Rhododendron maculiferum	153
57	Rhododendron lepidotum	151
58	Rhododendron liliiflorum	150
59	Rhododendron oreotrephes	144
60	Rhododendron phaeochrysum	143
61	Rhododendron tatsienense	142
62	Rhododendron virgatum	137
63	Rhododendron adenogynum	136
64	Rhododendron haofui	135
65	Rhododendron trichostomum	135
66	Rhododendron fastigiatum	134
67	Rhododendron przewalskii	131
68	Rhododendron floribundum	128
69	Rhododendron davidii	126
70	Rhododendron cephalanthum	121
71	Rhododendron brevinerve	118
72	Rhododendron discolor	115
73	Rhododendron henryi	115
74	Rhododendron bureavii	113
75	Rhododendron kwangsiense	113
76	Rhododendron anthopogonoides	112
77	Rhododendron seniavinii	112
78	Rhododendron calophytum var. openshawianum	111
79	Rhododendron phaeochrysum var. agglutinatum	107
80	Rhododendron auriculatum	99
81	Rhododendron faberi subsp. prattii	97
82	Rhododendron schlippenbachii	97
83	Rhododendron anthosphaerum	95
84	Rhododendron campylogynum	95
85	Rhododendron asterochnoum	94
86	Rhododendron decorum subsp. diaprepes	93
87	Rhododendron saluenense var. prostratum	91
88	Rhododendron capitatum	90
89	Rhododendron williamsianum	90
90	Rhododendron edgeworthii	85
91	Rhododendron levinei	85
92	Rhododendron rex	84
93	Rhododendron clementinae	83
94	Rhododendron dendrocharis	83
95	Rhododendron kwangtungense	83
96	Rhododendron neriiflorum	83
97	Rhododendron nivale	83
98	Rhododendron cyanocarpum	81
99	Rhododendron fulvum	80
100	Rhododendron cuneatum	78
101	Rhododendron hanceanum	78
102	Rhododendron coeloneurum	77
103	Rhododendron rufum	77
104	Rhododendron thymifolium	77
105	Rhododendron triflorum	77
106	Rhododendron cavaleriei	76
107	Rhododendron wasonii	76
108	Rhododendron orbiculare	74
109	Rhododendron arizelum	69
110	Rhododendron intricatum	69
111	Rhododendron primuliflorum	69
112	Rhododendron traillianum	69
113	Rhododendron redowskianum	68
114	Rhododendron crinigerum	67
115	Rhododendron rufescens	67
116	Rhododendron sinogrande	65
117	Rhododendron scabrifolium	64
118	Rhododendron coriaceum	62
119	Rhododendron floccigerum	62
120	Rhododendron xanthostephanum	61
121	Rhododendron agastum	58
122	Rhododendron telmateium	58
123	Rhododendron hemsleyanum	57
124	Rhododendron argyrophyllum subsp. omeiense	56
125	Rhododendron excellens	56
126	Rhododendron fuchsiifolium	56
127	Rhododendron nivale subsp. boreale	55
128	Rhododendron oligocarpum	55
129	Rhododendron rupicola	55
130	Rhododendron purdomii	54
131	Rhododendron faithiae	53
132	Rhododendron saluenense	53
133	Rhododendron taliense	53
134	Rhododendron tenue	53
135	Rhododendron genestierianum	51
136	Rhododendron bracteatum	50
137	Rhododendron nitidulum var. omeiense	48
138	Rhododendron chrysocalyx	48
139	Rhododendron forrestii	48
140	Rhododendron sulfureum	48
141	Rhododendron selense subsp. dasycladum	47
142	Rhododendron traillianum var. dictyotum	47
143	Rhododendron minutiflorum	47
144	Rhododendron ochraceum	47
145	Rhododendron augustinii subsp. chasmanthum	46
146	Rhododendron arboreum	46
147	Rhododendron ciliicalyx	46
148	Rhododendron eclecteum	46
149	Rhododendron hancockii	46
150	Rhododendron mucronatum	46
151	Rhododendron selense	46
152	Rhododendron phaeochrysum var. levistratum	45
153	Rhododendron roxieanum	45
154	Rhododendron watsonii	45
155	Rhododendron trichanthum	44
156	Rhododendron rex subsp. fictolacteum	43
157	Rhododendron sphaeroblastum	43
158	Rhododendron websterianum	43
159	Rhododendron chrysodoron	42
160	Rhododendron hainanense	42
161	Rhododendron brachyanthum subsp. hypolepidotum	41
162	Rhododendron campanulatum	41
163	Rhododendron pubescens	41
164	Rhododendron arboreum var. roseum	40
165	Rhododendron huanum	40
166	Rhododendron stewartianum	40
167	Rhododendron taipaoense	40
168	Rhododendron glanduliferum	38
169	Rhododendron longesquamatum	38
170	Rhododendron megacalyx	38
171	Rhododendron longipes var. chienianum	37
172	Rhododendron lacteum	37
173	Rhododendron zaleucum	37
174	Rhododendron coryanum	36
175	Rhododendron glischrum	36
176	Rhododendron haematodes	36
177	Rhododendron hunnewellianum	36
178	Rhododendron souliei	36
179	Rhododendron irroratum subsp. pogonostylum	35
180	Rhododendron megeratum	35
181	Rhododendron tsoi	35
182	Rhododendron russatum	34
183	Rhododendron sanguineum	34
184	Rhododendron flavidum	33
185	Rhododendron barbatum	32
186	Rhododendron adenopodum	31
187	Rhododendron changii	31
188	Rhododendron moupinense	31
189	Rhododendron vellereum	30
190	Rhododendron annae	29
191	Rhododendron jinxiuense	29
192	Rhododendron nitidulum	29
193	Rhododendron rigidum	29
194	Rhododendron aureum	28
195	Rhododendron balfourianum	28
196	Rhododendron hemitrichotum	28
197	Rhododendron lukiangense	28
198	Rhododendron praevernum	28
199	Rhododendron x pulchrum	28
200	Rhododendron annae subsp. laxiflorum	27
201	Rhododendron araiophyllum	27
202	Rhododendron longistylum	27
203	Rhododendron platypodum	27
204	Rhododendron vaccinioides	27
205	Rhododendron maculiferum subsp. anwheiense	26
206	Rhododendron calostrotum	26
207	Rhododendron praestans	26
208	Rhododendron callimorphum	25
209	Rhododendron naamkwanense	25
210	Rhododendron principis	25
211	Rhododendron argyrophyllum subsp. nankingense	24
212	Rhododendron mitriforme var. setaceum	24
213	Rhododendron rupicola var. chryseum	24
214	Rhododendron galactinum	24
215	Rhododendron radendum	24
216	Rhododendron balfourianum var. aganniphoides	23
217	Rhododendron rupicola var. muliense	23
218	Rhododendron apricum	23
219	Rhododendron maoerense	23
220	Rhododendron campylocarpum subsp. caloxanthum	22
221	Rhododendron nivale subsp. australe	22
222	Rhododendron citriniflorum var. horaeum	22
223	Rhododendron roxieanum var. cucullatum	22
224	Rhododendron strigillosum var. monosematum	22
225	Rhododendron chunii	22
226	Rhododendron emarginatum	22
227	Rhododendron keysii	22
228	Rhododendron meridionale	22
229	Rhododendron monanthum	22
230	Rhododendron cinnabarinum	21
231	Rhododendron mollicomum	21
232	Rhododendron nuttallii	21
233	Rhododendron wallichii	21
234	Rhododendron simiarum var. versicolor	20
235	Rhododendron chihsinianum	20
236	Rhododendron henryi var. dunnii	19
237	Rhododendron proteoides	19
238	Rhododendron dichroanthum	18
239	Rhododendron hongkongense	18
240	Rhododendron protistum	18
241	Rhododendron bulu	17
242	Rhododendron campylocarpum	17
243	Rhododendron impeditum	17
244	Rhododendron laudandum	17
245	Rhododendron thayerianum	17
246	Rhododendron tutcherae	17
247	Rhododendron aganniphum var. flavorufum	16
248	Rhododendron faucium	16
249	Rhododendron maddenii	16
250	Rhododendron vialii	16
251	Rhododendron x detonsum	16
252	Rhododendron ciliicalyx subsp. ciliicalyx	15
253	Rhododendron dichroanthum subsp. apodectum	15
254	Rhododendron denudatum	15
255	Rhododendron polycladum	15
256	Rhododendron semnoides	15
257	Rhododendron arboreum var. cinnamomeum	14
258	Rhododendron oreodoxa var. shensiense	14
259	Rhododendron lapponicum	14
260	Rhododendron mallotum	14
261	Rhododendron sargentianum	14
262	Rhododendron sanguineum var. himertum	13
263	Rhododendron amesiae	13
264	Rhododendron anthopogon	13
265	Rhododendron kongboense	13
266	Rhododendron mitriforme	13
267	Rhododendron nanpingense	13
268	Rhododendron pulchroides	13
269	Rhododendron searsiae	13
270	Rhododendron sidereum	13
271	Rhododendron delavayi var. peramoenum	12
272	Rhododendron crassimedium	12
273	Rhododendron saxatile	12
274	Rhododendron setosum	12
275	Rhododendron tephropeplum	12
276	Rhododendron selense subsp. jucundum	11
277	Rhododendron primuliflorum var. cephalanthoides	11
278	Rhododendron roxieanum var. oreonastes	11
279	Rhododendron trichostomum var. radinum	11
280	Rhododendron wardii var. puralbum	11
281	Rhododendron adenanthum	11
282	Rhododendron basilicum	11
283	Rhododendron hylaeum	11
284	Rhododendron keleticum	11
285	Rhododendron obtusum	11
286	Rhododendron sikangense	11
287	Rhododendron taggianum	11
288	Rhododendron wongii	11
289	Rhododendron orbiculare subsp. oblongum	10
290	Rhododendron calophytum var. pauciflorum	10
291	Rhododendron ochraceum var. brevicarpum	10
292	Rhododendron sikangense var. exquisitum	10
293	Rhododendron alutaceum	10
294	Rhododendron atrovirens	10
295	Rhododendron brachyanthum	10
296	Rhododendron hypenanthum	10
297	Rhododendron longipes	10
298	Rhododendron mackenzianum	10
299	Rhododendron mainlingense	10
300	Rhododendron rhuyuenense	10
301	Rhododendron taronense	10
302	Rhododendron viscigemmatum	10
303	Rhododendron clementinae subsp. aureodorsale	9
304	Rhododendron hunnewellianum subsp. rockii	9
305	Rhododendron heliolepis var. fumidum	9
306	Rhododendron grande	9
307	Rhododendron mekongense	9
308	Rhododendron nyingchiense	9
309	Rhododendron orthocladum	9
310	Rhododendron sperabiloides	9
311	Rhododendron yungningense	9
312	Rhododendron orbiculare subsp. cardiobasis	8
313	Rhododendron triflorum subsp. multiflorum	8
314	Rhododendron eclecteum var. bellatulum	8
315	Rhododendron heliolepis var. oporinum	8
316	Rhododendron rubiginosum var. leclerei	8
317	Rhododendron sanguineum var. cloiophorum	8
318	Rhododendron hejiangense	8
319	Rhododendron insigne	8
320	Rhododendron myrsinifolium	8
321	Rhododendron polyraphidoideum	8
322	Rhododendron rupivalleculatum	8
323	Rhododendron valentinianum	8
324	Rhododendron viridescens	8
325	Rhododendron wumingense	8
326	Rhododendron ciliicalyx subsp. lyi	7
327	Rhododendron kwangsiense var. obovatifolium	7
328	Rhododendron temenium var. dealbatum	7
329	Rhododendron dendricola	7
330	Rhododendron hippophaeoides	7
331	Rhododendron hodgsonii	7
332	Rhododendron indicum	7
333	Rhododendron kiangsiense	7
334	Rhododendron pachyphyllum	7
335	Rhododendron pendulum	7
336	Rhododendron subcerinum	7
337	Rhododendron tingwuense	7
338	Rhododendron tsaii	7
339	Rhododendron viscidum	7
340	Rhododendron campanulatum subsp. aeruginosum	6
341	Rhododendron glischrum subsp. rude	6
342	Rhododendron haematodes subsp. chaetomallum	6
343	Rhododendron agastum var. pennivenium	6
344	Rhododendron calostrotum var. calciphilum	6
345	Rhododendron chamaethomsonii var. chamaedoron	6
346	Rhododendron rubiginosum var. ptilostylum	6
347	Rhododendron sphaeroblastum var. wumengense	6
348	Rhododendron wasonii var. wenchuanense	6
349	Rhododendron balangense	6
350	Rhododendron beanianum	6
351	Rhododendron declivatum	6
352	Rhododendron dignabile	6
353	Rhododendron hirtipes	6
354	Rhododendron hypoblematosum	6
355	Rhododendron lulangense	6
356	Rhododendron meddianum	6
357	Rhododendron pemakoense	6
358	Rhododendron punctifolium	6
359	Rhododendron roxieoides	6
360	Rhododendron tanastylum	6
361	Rhododendron tapetiforme	6
362	Rhododendron temenium	6
363	Rhododendron westlandii	6
364	Rhododendron dichroanthum subsp. scyphocalyx	5
365	Rhododendron trichostomum var. ledoides	5
366	Rhododendron amundsenianum	5
367	Rhododendron aperantum	5
368	Rhododendron charitopes	5
369	Rhododendron citriniflorum	5
370	Rhododendron flumineum	5
371	Rhododendron gongshanense	5
372	Rhododendron invictum	5
373	Rhododendron mimetes	5
374	Rhododendron rhombifolium	5
375	Rhododendron sperabile	5
376	Rhododendron unciferum	5
377	Rhododendron yangmingshanense	5
378	Rhododendron dichroanthum subsp. septentrionale	4
379	Rhododendron aganniphum var. schizopeplum	4
380	Rhododendron eudoxum var. mesopolium	4
381	Rhododendron naamkwanense var. cryptonerve	4
382	Rhododendron polyraphidoideum var. montanum	4
383	Rhododendron protistum var. giganteum	4
384	Rhododendron stamineum var. lasiocarpum	4
385	Rhododendron temenium var. gilvum	4
386	Rhododendron aberconwayi	4
387	Rhododendron bamaense	4
388	Rhododendron bellissimum	4
389	Rhododendron brevicaudatum	4
390	Rhododendron ciliipes	4
391	Rhododendron dasypetalum	4
392	Rhododendron fragariiflorum	4
393	Rhododendron griersonianum	4
394	Rhododendron hirsutipetiolatum	4
395	Rhododendron jingangshanicum	4
396	Rhododendron leptocarpum	4
397	Rhododendron mengtszense	4
398	Rhododendron poilanei	4
399	Rhododendron pseudochrysanthum	4
400	Rhododendron pudorosum	4
401	Rhododendron ramipilosum	4
402	Rhododendron roseatum	4
403	Rhododendron rufohirtum	4
404	Rhododendron shimianense	4
405	Rhododendron spanotrichum	4
406	Rhododendron alutaceum var. iodes	3
407	Rhododendron alutaceum var. russotinctum	3
408	Rhododendron chamaethomsonii var. chamaethauma	3
409	Rhododendron mekongense var. melinanthum	3
410	Rhododendron microphyton var. trichanthum	3
411	Rhododendron sanguineum var. didymoides	3
412	Rhododendron sanguineum var. didymum	3
413	Rhododendron tatsienense var. nudatum	3
414	Rhododendron zaleucum var. zaleucum	3
415	Rhododendron asperulum	3
416	Rhododendron bainbridgeanum	3
417	Rhododendron brachypodum	3
418	Rhododendron chunienii	3
419	Rhododendron detersile	3
420	Rhododendron elegantulum	3
421	Rhododendron erastum	3
422	Rhododendron fulgens	3
423	Rhododendron guizhouense	3
424	Rhododendron habrotrichum	3
425	Rhododendron henanense	3
426	Rhododendron jasminoides	3
427	Rhododendron jinpingense	3
428	Rhododendron kendrickii	3
429	Rhododendron lanatum	3
430	Rhododendron leucaspis	3
431	Rhododendron litchiifolium	3
432	Rhododendron niveum	3
433	Rhododendron oldhamii	3
434	Rhododendron petrocharis	3
435	Rhododendron seinghkuense	3
436	Rhododendron tsariense	3
437	Rhododendron yaoshanicum	3
438	Rhododendron longistylum subsp. decumbens	2
439	Rhododendron przewalskii subsp. chrysophyllum	2
440	Rhododendron mekongense var. rubrolineatum	2
441	Rhododendron oreodoxa var. adenostylosum	2
442	Rhododendron tanastylum var. tanastylum	2
443	Rhododendron boothii	2
444	Rhododendron catacosmum	2
445	Rhododendron ciliatum	2
446	Rhododendron erosum	2
447	Rhododendron fangchengense	2
448	Rhododendron guangnanense	2
449	Rhododendron heteroclitum	2
450	Rhododendron hookeri	2
451	Rhododendron kyawii	2
452	Rhododendron labolengense	2
453	Rhododendron lasiostylum	2
454	Rhododendron leptocladon	2
455	Rhododendron leptopeplum	2
456	Rhododendron lindleyi	2
457	Rhododendron longifalcatum	2
458	Rhododendron malipoense	2
459	Rhododendron medoense	2
460	Rhododendron minyaense	2
461	Rhododendron miyiense	2
462	Rhododendron potaninii	2
463	Rhododendron praeteritum	2
464	Rhododendron qianyangense	2
465	Rhododendron sinofalconeri	2
466	Rhododendron taishunense	2
467	Rhododendron vesiculiferum	2
468	Rhododendron wightii	2
469	Rhododendron x erythrocalyx	2
470	Rhododendron x sinosimulans	2
471	Rhododendron charitopes subsp. tsangpoense	1
472	Rhododendron nivale subsp. nivale	1
473	Rhododendron thomsonii subsp. lopsangianum	1
474	Rhododendron delavayi var. delavayi	1
475	Rhododendron delavayi var. pilostylum	1
476	Rhododendron flavidum var. psilostylum	1
477	Rhododendron hemsleyanum var. chengianum	1
478	Rhododendron henryi var. henryi	1
479	Rhododendron mekongense var. longipilosum	1
480	Rhododendron neriiflorum var. appropinquans	1
481	Rhododendron praeteritum var. hirsutum	1
482	Rhododendron roxieanum var. roxieanum	1
483	Rhododendron sanguineum var. haemaleum	1
484	Rhododendron spiciferum var. album	1
485	Rhododendron spiciferum var. spiciferum	1
486	Rhododendron trichostomum var. trichostomum	1
487	Rhododendron valentinianum var. oblongilobatum	1
488	Rhododendron argipeplum	1
489	Rhododendron atropunicum	1
490	Rhododendron baileyi	1
491	Rhododendron breviperulatum	1
492	Rhododendron camelliiflorum	1
493	Rhododendron chamaethomsonii	1
494	Rhododendron coelicum	1
495	Rhododendron crassistylum	1
496	Rhododendron cretaceum	1
497	Rhododendron dawuense	1
498	Rhododendron eudoxum	1
499	Rhododendron flavantherum	1
500	Rhododendron guizhongense	1
501	Rhododendron kanehirae	1
502	Rhododendron kasoense	1
503	Rhododendron lanigerum	1
504	Rhododendron ludlowii	1
505	Rhododendron magnificum	1
506	Rhododendron morii	1
507	Rhododendron nymphaeoides	1
508	Rhododendron octandrum	1
509	Rhododendron platyphyllum	1
510	Rhododendron pronum	1
511	Rhododendron pubicostatum	1
512	Rhododendron pugeense	1
513	Rhododendron rhodanthum	1
514	Rhododendron rubropilosum	1
515	Rhododendron scopulorum	1
516	Rhododendron sherriffii	1
517	Rhododendron thomsonii	1
518	Rhododendron trichogynum	1
519	Rhododendron tubulosum	1
520	Rhododendron uvariifolium	1
521	Rhododendron wolongense	1
522	Rhododendron x diphrocalyx	1
523	Rhododendron xanthocodon	1
524	Rhododendron zheguense	1
525	Rhododendron zhongdianense	1
